# Supplementary figures and images for: Dishevelled phase separation promotes Wnt signalosome assembly and destruction complex disassembly
Source: PubMed Central journal article supplement — J Cell Biol. 2022 Nov 7;221(12):e202205069. doi: 10.1083/jcb.202205069 (PMC9811998; doi:10.1083/jcb.202205069), 2022-11-07

Figure 4D

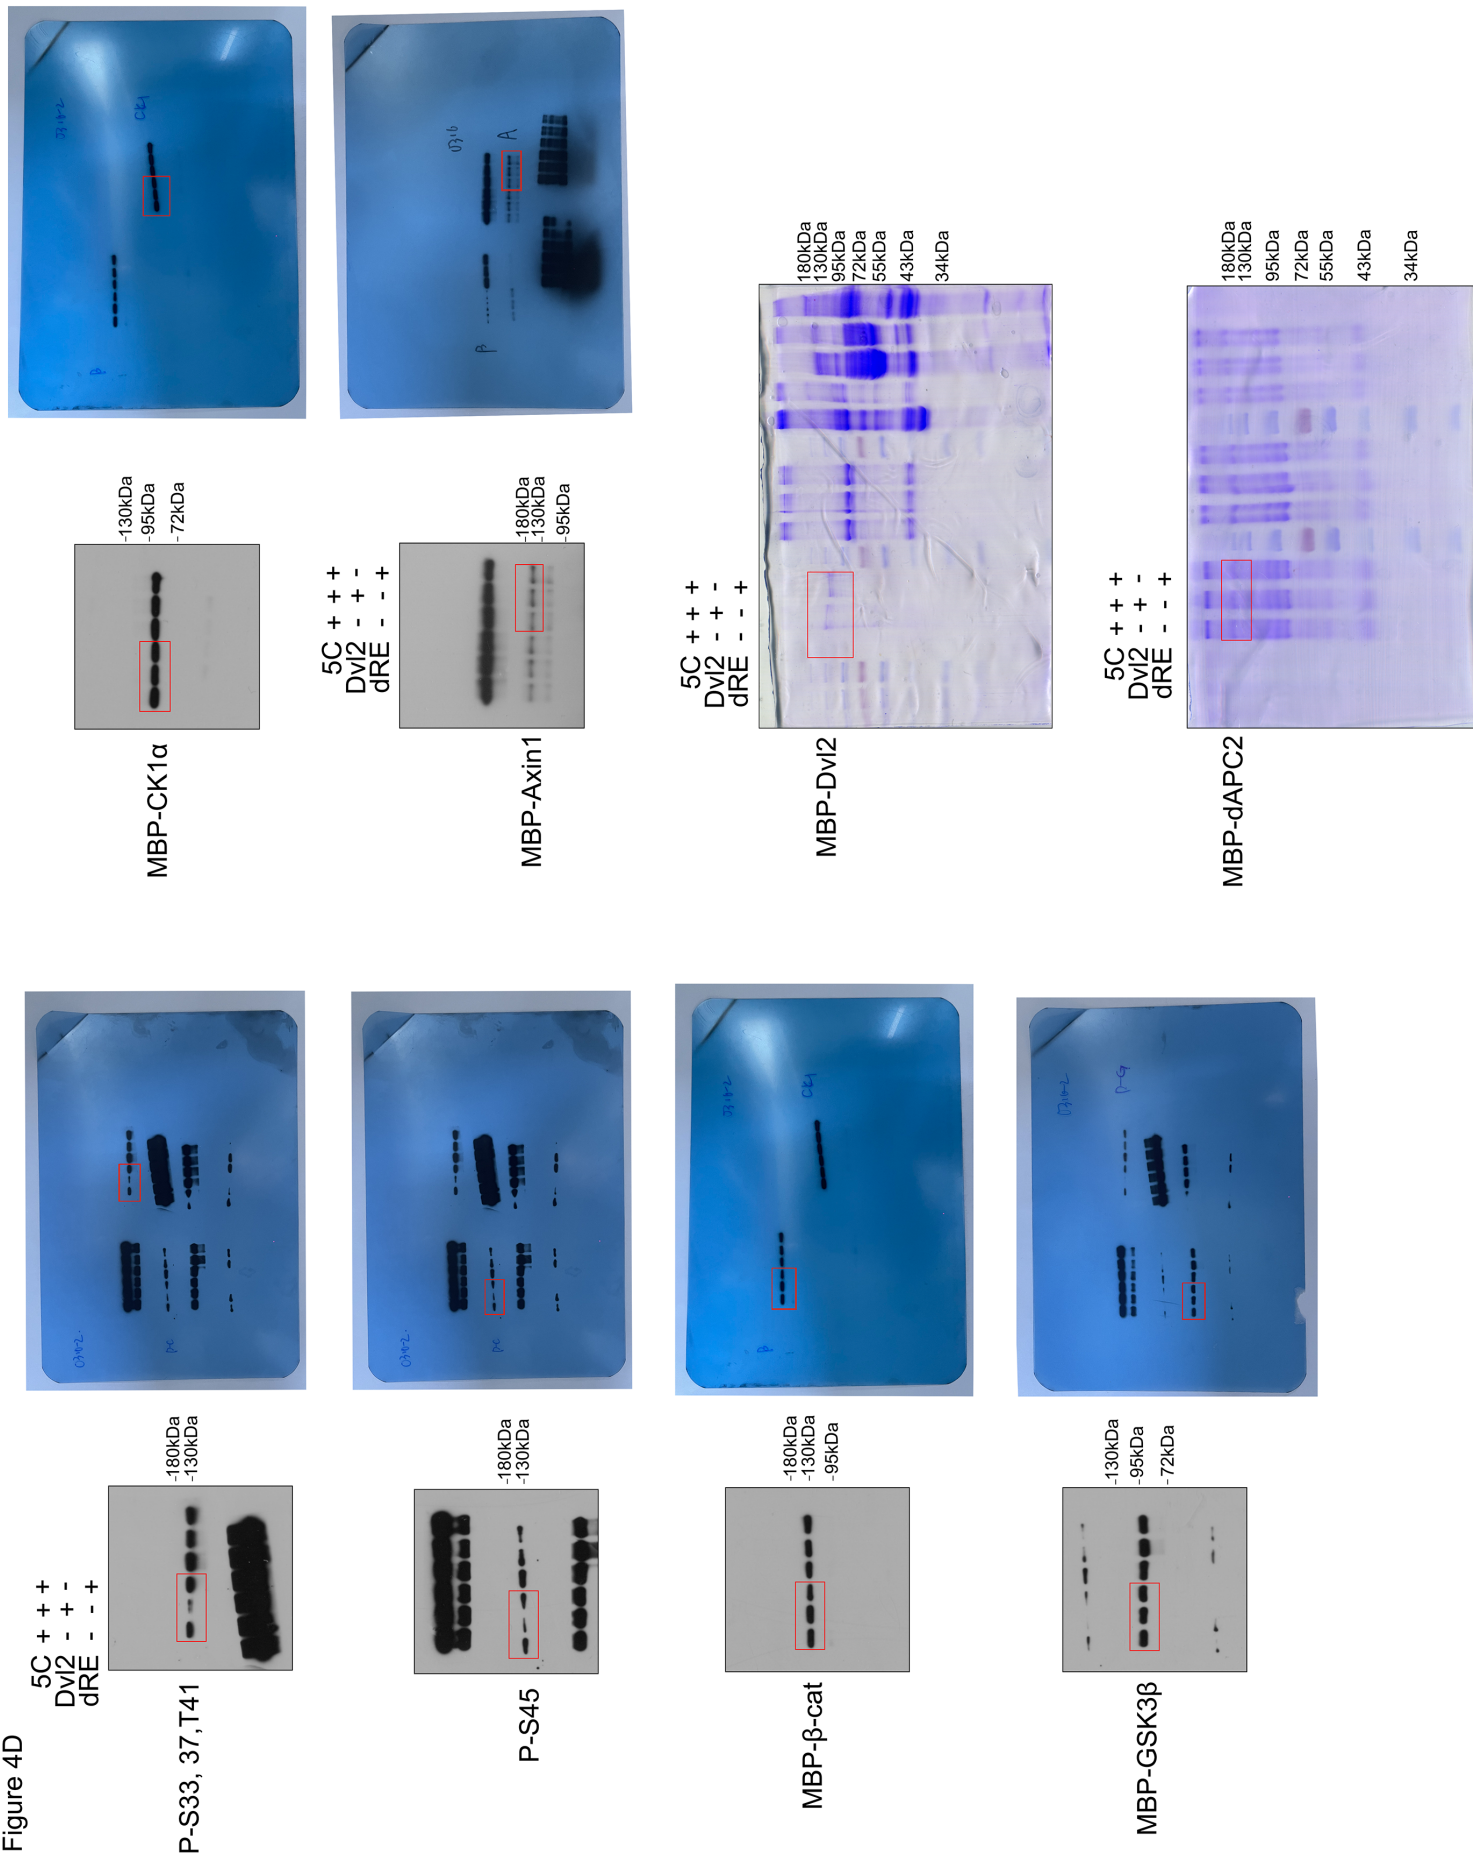

Supplement: JCB_202205069_SourceDataF4.pdf [file JCB_202205069_SourceDataF4.pdf]

Figure S2A

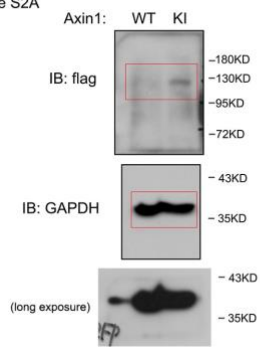

Figure S2H

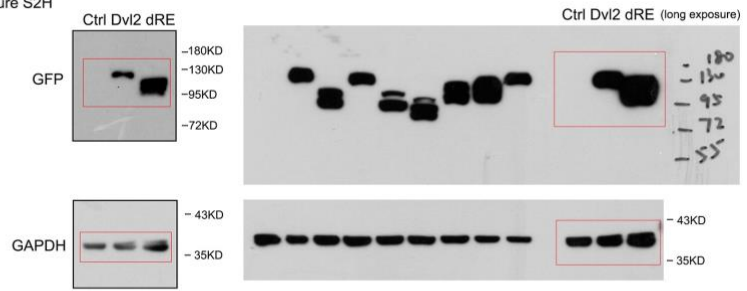

Supplement: JCB_202205069_SourceDataFS2.pdf [file JCB_202205069_SourceDataFS2.pdf]
